# Supplementary material for: Supramolecular medical antibacterial tissue adhesive prepared based on natural small molecules
Source: Royal Society of Chemistry journal article supplement (doi:10.1039/d0bm01101k), 2020-01-01
Supplement: d0bm01101k1.pdf [file d0bm01101k1.pdf]

## Electronic Supplementary Information

### **Supramolecular medical antibacterial tissue adhesive prepared based on natural small molecules**

Junying Chen<sup>a</sup>, Tian Yuan<sup>c</sup>, Zuozhen Liu<sup>a,b,\*</sup>

<sup>a</sup>Key Laboratory for Specially Functional Polymers and Related Technology of Ministry of Education, School of Materials Science and Engineering, East China University of Science and Technology, Shanghai 200237, China

<sup>b</sup>Key Laboratory for Functional Biopolymer Materials and Technology of Ministry of Education, School of Biological Engineering, East China University of Science and Technology, Shanghai 200237, China

<sup>c</sup>Institute of Nano and Biopolymeric Materials, Department of Polymeric Materials, School of Materials Science and Engineering, Tongji University, Shanghai 201804, China

E-mail: [lzz@ecust.edu.cn](mailto:lzz@ecust.edu.cn) or a794202291@outlook.com

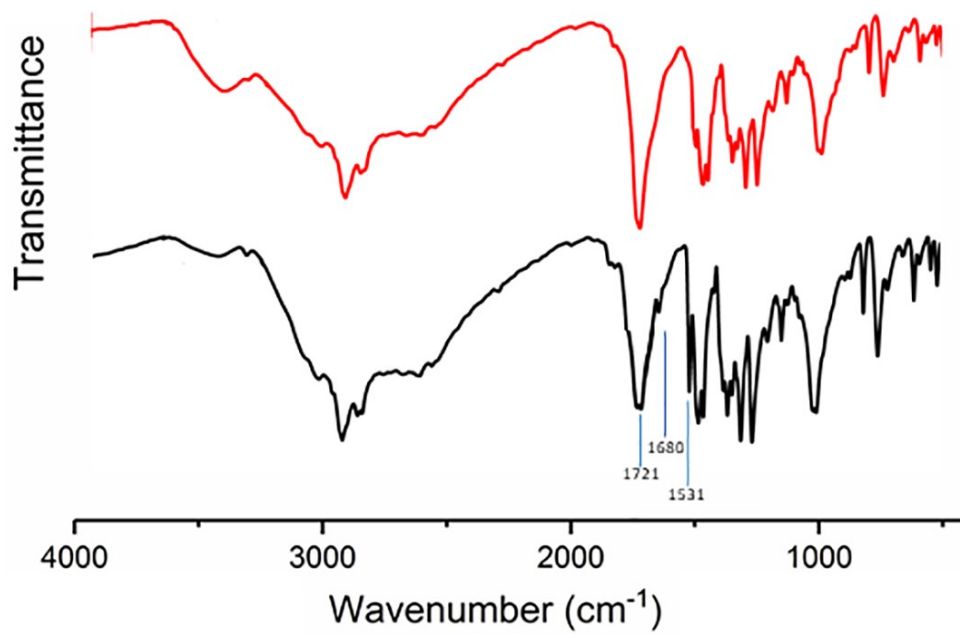

**Figure. S1.** FTIR spectra of TAN (black curve) powder and TA (red curve).

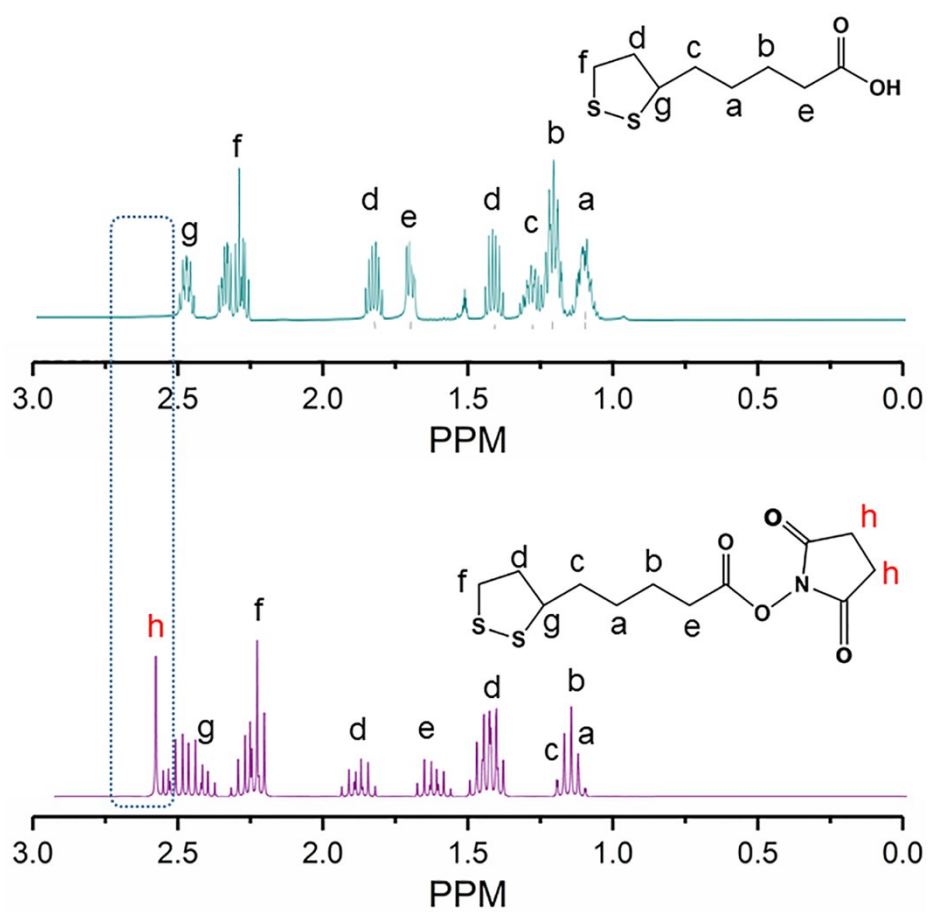

**Figure. S2.**  $^1\text{H}$  NMR spectra of TA and TAN.

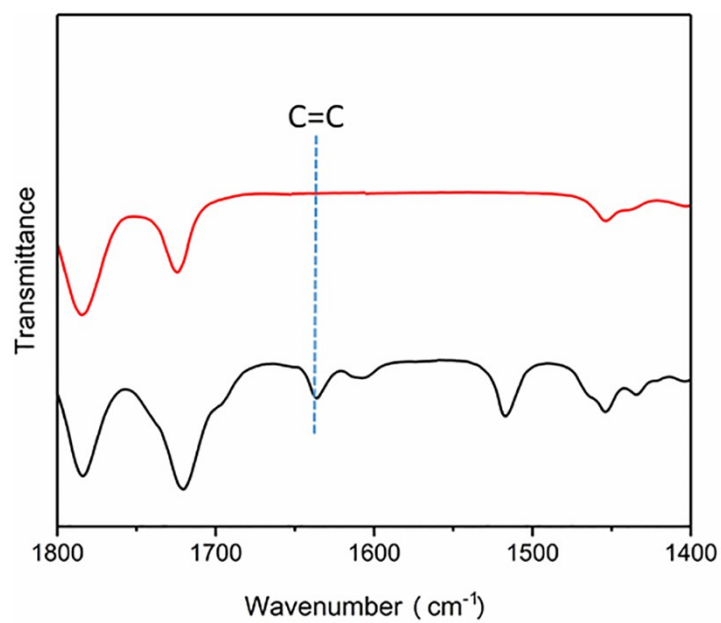

**Figure. S3.** FTIR spectra of TAN-PEGDA (before polymerization, black curve) and TAN-PEGDA (after polymerization, red curve) from 1800 to 1400 cm<sup>-1</sup>.

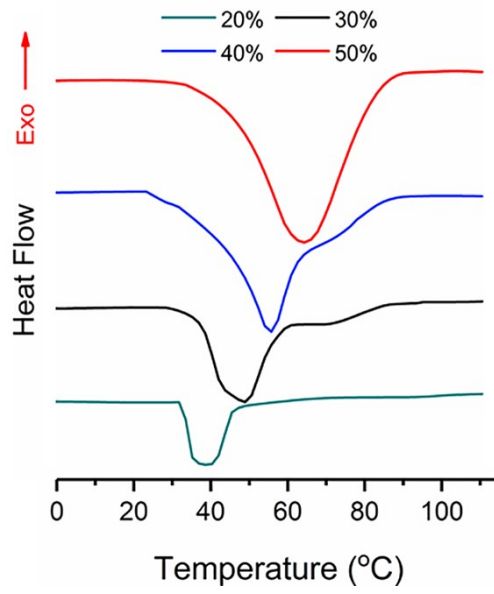

**Figure. S4.** Melting temperature distribution of TAN-PEGDA, measured by DSC.

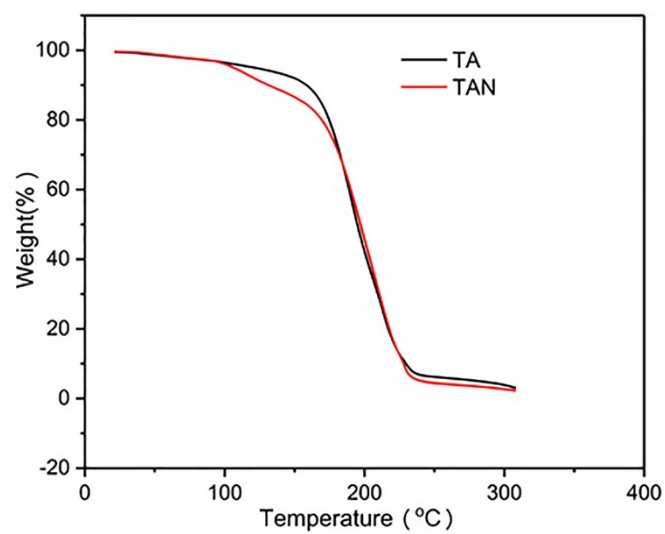

**Figure. S5.** Thermal decomposition behavior of TA and TAN.

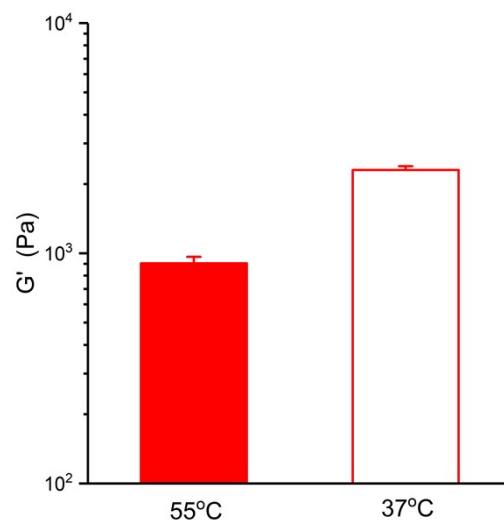

**Figure. S6.** Changes in storage modulus ( $G'$ ) of the TAN-PEGDA at 55 or 37 °C.

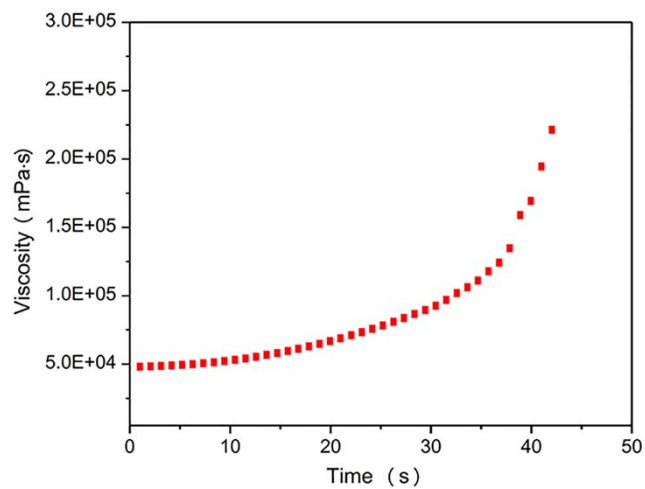

**Figure. S7.** Time course of viscosity after dropping the temperature from 55 °C to 37 °C for TAN-PEGDA.



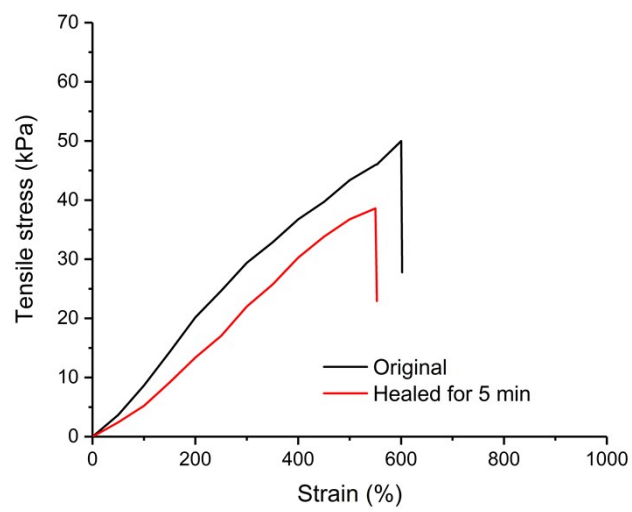

**Figure. S8.** Stress-strain curves of the healed samples.

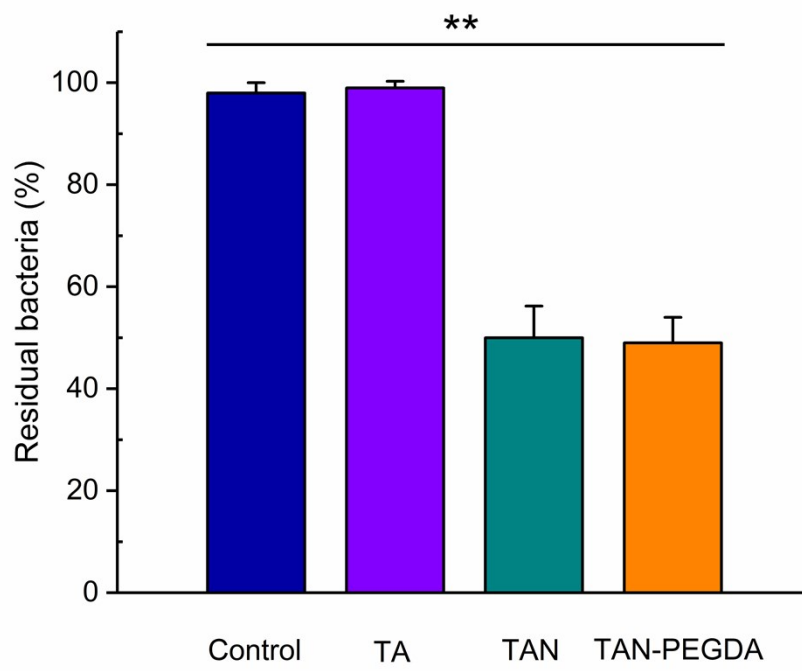

**Figure. S9.** The bacterial colonies of *E. coli*.

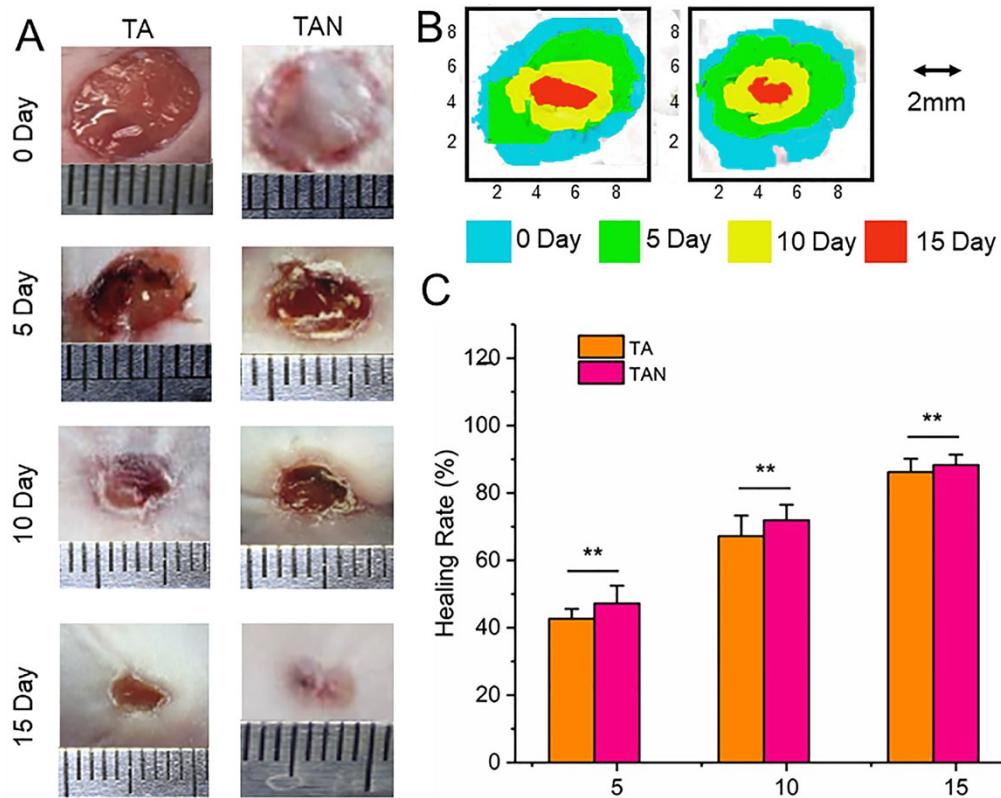

**Figure. S10.** A) Photographs of wounds on 0th, 5th, 10th, and 15th day for TA and TAN; B) Schematic diagram of wound area during 15 d for TA and TAN; C) Healing rate for each group.

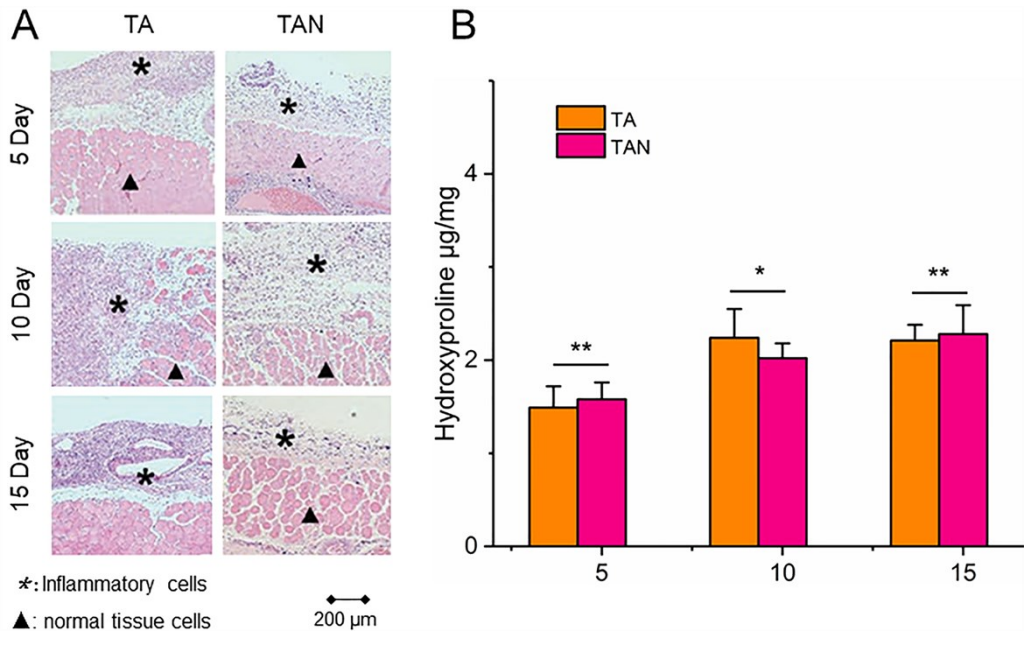

**Figure. S11.** A) H&E staining sections of the specimens and surrounding tissues taken at different time points; B) Collagen amount by determining the hydroxyproline.
